# Supplementary material for: Born captive: A survey of the lion breeding, keeping and hunting industries in South Africa
Source: PLOS journal article supplement (doi:10.1371/journal.pone.0217409), 2019-05-28
Supplement: S3 (10.1371/journal.pone.0217409.s003) [file journal.pone.0217409.s003]

## PDF version of NATIONAL CAPTIVE LION SURVEY (South Africa) (V2: REVISED FOR 2018)

### Welcome to the Survey

#### OVERVIEW

In accordance with the annotation to the Appendix II listing for the African Lion adopted at the 17th Conference of the Parties to CITES (CoP17) in October 2016, South Africa is required to establish an export quota for lion bones. The South African Scientific Authority is mandated to advise the Department of Environmental Affairs (DEA) on the size of the quota on an annual basis.

In order to provide sound scientific decision support to the DEA, a research project has been initiated by the South African Scientific Authority with the following aims to: (1) increase our understanding of the captive lion breeding industry and trade in lions (especially bones, but also other products and live lions) in South Africa; (2) investigate the trade in captive produced lion bones under a quota system; (3) gain a better understanding of the consequences of the US ban on imports of captive-origin trophies; and (4) strengthen the evidence base for the annual review of the lion bone export quota.

#### INVITATION

We hope you will take part in this study by completing this questionnaire. **You do not have to answer all the questions**, but we would appreciate you answering as many questions as honestly as possible. If there are certain activities that the facility does not do (e.g. hunting), then you will be automatically redirected to a different set of questions.

The **questionnaire can be completed anonymously**; however, even if you do choose to reveal your name, then neither your name nor that of the facility will appear in any of the publications or reports resulting from this survey.

The survey will remain open until a date to be confirmed in 2018. The survey can be completed in Afrikaans ([Link to survey in Afrikaans](#)).

If you received an invitation from SAPA (South African Predator Association) to participate, then the hardcopy of this survey is available from SAPA. SAPA has agreed to capture these survey responses electronically, thereby guaranteeing further anonymity. The original questionnaires returned to SAPA will not be copied to us.

Submission of the questionnaire will be taken as your consent for us to use the information you provide.

**NOTE: If you experience a technical problem with a question, please will you inform us afterwards which number it is.**

Should you have any queries or concerns about the research, please contact any member of the collaborating team:

- \* Dr Vivienne Williams (vivienne-ncls@wildscience.co.za) University of the Witwatersrand (Primary researcher)
- \* Mr Michael 't Sas-Rolfes tsas.rolfes@gmail.com) Independent researcher / University of Oxford
- \* Ms Michele Pfab (M.Pfab@sanbi.org.za) SANBI

Ethics Clearance No.: H17/06/55 (Universiteit van die Witwatersrand)

\* **1. [Please note before you start:](#)** several broad questions will be asked about the income generated from lion sales (live, products, trophies, etc). In the interests of giving us the correct information when responding to these important questions, please consider the option of remaining anonymous IF it means that you are more likely to provide an accurate answer. If you are in anyway unsure, rather remain anonymous. All information will be used for analytical purposes only and will be treated as confidential.

- ☐ [I prefer to remain anonymous](#)
- ☐ [I do not mind identifying myself and/or the facility/business](#)

PDF version of NATIONAL CAPTIVE LION SURVEY (South Africa) (V2: REVISED FOR 2018)

**SECTION A: Participant Information**

**2. Facility**

Respondent name

Facility name

**\* 3. Province the facility is in?**

**\* 4. The person answering this questionnaire is:**

☐ The owner of the facility

☐ An employee of the facility

☐ Other (please specify)

## PDF version of NATIONAL CAPTIVE LION SURVEY (South Africa) (V2: REVISED FOR 2018)

### SECTION B: Facility Information

**5. What year did the facility open?**

**\* 6. Is the facility SAPA\* accredited and/or a member of PHASA\*\* and/or a member of PAAZA\*\*\*?**

*\* South African Predator Association; \*\* Professional Hunters Association of South Africa; \*\*\* Pan African Association of Zoos and Aquaria*

- ☐ SAPA accredited
 ☐ PHASA member
 ☐ SAPA & PHASA
 ☐ PAAZA
- ☐ None of these
- ☐ Other (please specify)

**\* 7. Purpose of the facility? (select all that apply)**

- ☐ Breeding
 ☐ Keeping
 ☐ Hunting
- ☐ Display
- ☐ Other (please specify)

**8. Number of people employed at the facility?**

**\* 9. Reasons for breeding (select all that apply)**

- ☐ Breeding for live sales
 ☐ Breeding for relocation purposes
- ☐ Breeding for hunting
 ☐ Not applicable
- ☐ Breeding for products/derivatives (incl. bones)
 ☐ For tourism
- ☐ Breeding for personal use/pleasure
- ☐ Other (please specify)



**\* 10. Reasons for keeping** (select all that apply)

*\* 'Keeping' for hunting includes lions purchased from other breeders and kept for selling to hunting outfitters*

- |                                                                |                                                    |                                         |
|----------------------------------------------------------------|----------------------------------------------------|-----------------------------------------|
| <input type="checkbox"/> For hunting*                          | <input type="checkbox"/> For personal use/purposes | <input type="checkbox"/> For 'muthi'    |
| <input type="checkbox"/> For skeletons/bones to Asia           | <input type="checkbox"/> For live sales            | <input type="checkbox"/> Not applicable |
| <input type="checkbox"/> For products/derivatives (e.g. skins) | <input type="checkbox"/> For tourism               |                                         |
| <input type="checkbox"/> * Other (please specify)              |                                                    |                                         |

**11. Rank the core purpose(s) of the facility, starting from 1=most important.(select as many apply)**

Breeding and rearing

Hunting safaris

Lion bone sales

Zoological garden

Predator park

Education facility

General tourism

Interactive tourism (e.g. petting, walking with lions)

Live sales

Rehabilitation centre

Sanctuary / rescue

Guest lodge with wedding/conference venue

Conservation facility

Other

**12. Regarding paying visitors\*:** (\* e.g. hunters, clients, tourists, scholars, etc)

On average, how many does the facility get per year?

Is the number of visitors increasing, decreasing or stable?

### 13. What is the approximate size of: (specify whether in units of ha, km<sup>2</sup>, m<sup>2</sup>)

the entire property

the total area set aside for breeding lions

the total area set aside for growing and/or keeping lions

the total area set aside for released lions to be hunted

the total area set aside for display

### 14. From January 2016, did:

|                                            | Increase              | Decrease              | Stay the same         | N/A                   |
|--------------------------------------------|-----------------------|-----------------------|-----------------------|-----------------------|
| The total number of lions on the property: | <input type="radio"/> | <input type="radio"/> | <input type="radio"/> | <input type="radio"/> |
| The total breeding area:                   | <input type="radio"/> | <input type="radio"/> | <input type="radio"/> | <input type="radio"/> |
| The total keeping and/or growing area:     | <input type="radio"/> | <input type="radio"/> | <input type="radio"/> | <input type="radio"/> |
| The total hunting area:                    | <input type="radio"/> | <input type="radio"/> | <input type="radio"/> | <input type="radio"/> |

### 15. Estimated annual value of sales (1): indicate per activity from the drop down options:

**NB: We would ideally like data going back to 2012. However, if you can't remember figures for some of those years, we would strongly encourage that you at least provide estimates for 2015 to present, and omit what you don't recall.**

|      | Live sales for breeding | Live sales for trophy hunting | Trophy hunting on the property: international clients (packages) | Trophy hunting on the property: SA clients |
|------|-------------------------|-------------------------------|------------------------------------------------------------------|--------------------------------------------|
| 2012 | <input type="text"/>    | <input type="text"/>          | <input type="text"/>                                             | <input type="text"/>                       |
| 2013 | <input type="text"/>    | <input type="text"/>          | <input type="text"/>                                             | <input type="text"/>                       |
| 2014 | <input type="text"/>    | <input type="text"/>          | <input type="text"/>                                             | <input type="text"/>                       |
| 2015 | <input type="text"/>    | <input type="text"/>          | <input type="text"/>                                             | <input type="text"/>                       |
| 2016 | <input type="text"/>    | <input type="text"/>          | <input type="text"/>                                             | <input type="text"/>                       |
| 2017 | <input type="text"/>    | <input type="text"/>          | <input type="text"/>                                             | <input type="text"/>                       |

Other (please specify)



**16. Estimated annual value of sales (2): indicate per activity from the drop down options:**

**NB: We would ideally like data going back to 2012. However, if you can't remember figures for some of those years, we would strongly encourage that you at least provide estimates for 2015 to present, and omit what you don't recall.**

|      | Live sales for keeping | Bone/skeleton sales for export market | Skin/body part sales for 'muti' | Display/ tourism / educational visits |
|------|------------------------|---------------------------------------|---------------------------------|---------------------------------------|
| 2012 | <input type="text"/>   | <input type="text"/>                  | <input type="text"/>            | <input type="text"/>                  |
| 2013 | <input type="text"/>   | <input type="text"/>                  | <input type="text"/>            | <input type="text"/>                  |
| 2014 | <input type="text"/>   | <input type="text"/>                  | <input type="text"/>            | <input type="text"/>                  |
| 2015 | <input type="text"/>   | <input type="text"/>                  | <input type="text"/>            | <input type="text"/>                  |
| 2016 | <input type="text"/>   | <input type="text"/>                  | <input type="text"/>            | <input type="text"/>                  |
| 2017 | <input type="text"/>   | <input type="text"/>                  | <input type="text"/>            | <input type="text"/>                  |

Other (please specify)

**17. Did the January 2016 US ban on the import of captive-produced lion trophies impact your business in any way?**

☐ Yes ☐ No ☐ N/A

**18. Since you answered 'Yes', please indicate how you are adapting to the impact (select all that apply)**

- ☐ We have scaled down breeding production ☐ We have sold off live lion stock
- ☐ We have redirected the business to focus on the lion bone trade ☐ We have euthanised lions
- ☐ We have redirected the business to focus on interactive tourism ☐ We have continued business as usual
- ☐ We have had to let go of employees/workers
- ☐ Other (please specify)



**19. If the US ban continues to be implemented with no sign that it will be lifted in the near future, we will (select all that apply)**

- |                                                                                    |                                                       |
|------------------------------------------------------------------------------------|-------------------------------------------------------|
| <input type="checkbox"/> Convert the business to another form of wildlife breeding | <input type="checkbox"/> Focus on interactive tourism |
| <input type="checkbox"/> Close the business                                        | <input type="checkbox"/> Continue business as usual   |
| <input type="checkbox"/> Focus on the lion bone trade                              | <input type="checkbox"/> Euthanise all lion stock     |
| <input type="checkbox"/> Other (please specify)                                    |                                                       |

**20. In addition to the US ban, if the UK and/or Europe also implements a ban on the import of lion hunting trophies, we will: (select all that apply)**

- |                                                                                    |                                                                                                                     |
|------------------------------------------------------------------------------------|---------------------------------------------------------------------------------------------------------------------|
| <input type="checkbox"/> Convert the business to another form of wildlife breeding | <input type="checkbox"/> Downscale, but continue production expecting that the US bans will lift in the near future |
| <input type="checkbox"/> Close the business                                        | <input type="checkbox"/> Euthanise all lion stock                                                                   |
| <input type="checkbox"/> Focus on the lion bone trade                              | <input type="checkbox"/> Continue business as usual                                                                 |
| <input type="checkbox"/> Focus on interactive tourism                              |                                                                                                                     |
| <input type="checkbox"/> Other (please specify)                                    |                                                                                                                     |

**21. Will a lion bone quota restrict your business in any way?**

- ☐ Yes ☐ No ☐ We are not currently in the lion bone business

**22. Since you answered Yes, how will you adapt the business (select all that apply)**

- |                                                                       |                                                       |
|-----------------------------------------------------------------------|-------------------------------------------------------|
| <input type="checkbox"/> Will stop selling bones                      | <input type="checkbox"/> Close the business           |
| <input type="checkbox"/> Will continue selling bones, but downscale   | <input type="checkbox"/> Focus on interactive tourism |
| <input type="checkbox"/> Search for alternative markets for the bones | <input type="checkbox"/> Continue business as usual   |
| <input type="checkbox"/> Other (please specify)                       |                                                       |

**23. In the last two years, has the number of lions euthanised at the facility increased?**

☐ Yes

☐ No

☐ N/A

If Yes, indicate when this started and the reasons:

**24. Do you think the general trade in captive produced lions (live and products/bones/derivatives) affects wild lion populations? How?**

PDF version of NATIONAL CAPTIVE LION SURVEY (South Africa) (V2: REVISED FOR 2018)

**SECTION C: Captive stock numbers**

**25. By 31 January 2018, approximately how many of the following did you have?** Enter a number in each line [including zero (0) if applicable]

Adult males (3+ years)

Adult females (3+ years)

Subadults all sexes (1-3 years)

Cubs (all sexes) (less than 1 year)

**26. By 31 January 2017, approximately how many of the following did you have?** Enter a number in each line [including zero (0) if applicable]

Adult males (3+ years)

Adult females (3+ years)

Subadults all sexes (1-3 years)

Cubs (all sexes) (less than 1 year)

**27. By 31 January 2016, approximately how many of the following did you have?**

Adult males (3+ years)

Adult females (3+ years)

Subadult all sexes (1-3 years)

Cubs (all sexes) (less than 1 year)

**28. By 31 January 2015, approximately how many of the following did you have?**

Adult males (3+ years)

Adult females (3+ years)

Subadult all sexes (1-3 years)

Cubs (all sexes) (less than 1 year)

**29. From where has the current lion stock in the facility been sourced:(select all that apply to your facility)**

☐ Lions bred in this facility

☐ Wild-sourced lions from South Africa

☐ Lions from breeders in South Africa

☐ Wild-sourced lions from elsewhere in Africa

☐ Lions from breeders elsewhere in Africa

☐ Do not know

☐ Lions from breeders elsewhere

☐ Other\*

☐ Other (please specify)



**30. From where was the original lion stock for the facility sourced: (select all that apply to your facility)**

- |                                                                  |                                                                      |
|------------------------------------------------------------------|----------------------------------------------------------------------|
| <input type="checkbox"/> Lions bred in this facility             | <input type="checkbox"/> Wild-sourced lions from South Africa        |
| <input type="checkbox"/> Lions from breeders in South Africa     | <input type="checkbox"/> Wild-sourced lions from elsewhere in Africa |
| <input type="checkbox"/> Lions from breeders elsewhere in Africa | <input type="checkbox"/> Do not know                                 |
| <input type="checkbox"/> Lion breeders elsewhere                 | <input type="checkbox"/> Other*                                      |
| <input type="checkbox"/> Circuses                                |                                                                      |
| <input type="checkbox"/> Other (please specify)                  |                                                                      |

PDF version of NATIONAL CAPTIVE LION SURVEY (South Africa) (V2: REVISED FOR 2018)

Redirect question

\* 31. Is the purpose of this facility for hunting only (i.e. no breeding)

- ☐ No (redirect to Q32)
- ☐ Yes, the purpose of the facility is for hunting only (redirect to Q45)

PDF version of NATIONAL CAPTIVE LION SURVEY (South Africa) (V2: REVISED FOR 2018)

Redirect question

**\* 32. Does the facility breed lions?**

- ☐ Yes, we breed lions (redirect to Q33)
- ☐ No, we do not breed lions (redirect to Q39)

## PDF version of NATIONAL CAPTIVE LION SURVEY (South Africa) (V2: REVISED FOR 2018)

### SECTION D: Lion breeding

#### 33. How many adults (3+ years) are presently being used to breed?

Number of adult males

Number of adult females

#### 34. Indicate the average percentage that these factors result in a reduction in lion numbers at this facility:

Euthanasia

Selling as live animals

Hunting

Natural mortalities

Fights

Poaching

#### 35. How are lion numbers controlled at the facility? (answer all that apply)

☐ Euthanising

☐ Sterilisation: females

☐ Hunting

☐ Separation of adults

☐ Contraception

☐ Natural mortalities

☐ Sterilisation: males

☐ Selling

☐ Fights

☐ Other (please specify)



**36. Has the facility ever introduced wild lions into its breeding stock?**

☐ Yes

☐ No

If yes, indicate when, where and/or which populations(s) the stock was from

**37. Please answer Yes, No, or N/A to the following questions:**

|                                                                                      | Yes                   | No                    | N/A                   |
|--------------------------------------------------------------------------------------|-----------------------|-----------------------|-----------------------|
| Does your facility keep a stud book?                                                 | <input type="radio"/> | <input type="radio"/> | <input type="radio"/> |
| Are the lions marked in a manner that they are identifiable (e.g. microchipped, etc) | <input type="radio"/> | <input type="radio"/> | <input type="radio"/> |
| Have the lions been DNA analysed?                                                    | <input type="radio"/> | <input type="radio"/> | <input type="radio"/> |

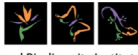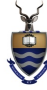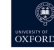

## PDF version of NATIONAL CAPTIVE LION SURVEY (South Africa) (V2: REVISED FOR 2018)

### Redirect question

**\* 38. Has the facility sold live lions since 2012?**

- ☐ Yes, we have sold live lions (redirect to Q39 )
- ☐ No, we have have not sold live lions (redirect to Q45)

## PDF version of NATIONAL CAPTIVE LION SURVEY (South Africa) (V2: REVISED FOR 2018)

### SECTION E: Live lion trade

#### 39. Estimate the number of live lions sold from this facility in the specified years:

|                                                               | 2014                 | 2015                 | 2016                 | 2017                 |
|---------------------------------------------------------------|----------------------|----------------------|----------------------|----------------------|
| To breeding facilities in South Africa                        | <input type="text"/> | <input type="text"/> | <input type="text"/> | <input type="text"/> |
| For hunting purposes in South Africa                          | <input type="text"/> | <input type="text"/> | <input type="text"/> | <input type="text"/> |
| To keeping facilities in South Africa                         | <input type="text"/> | <input type="text"/> | <input type="text"/> | <input type="text"/> |
| To international breeders or keepers                          | <input type="text"/> | <input type="text"/> | <input type="text"/> | <input type="text"/> |
| To international hunting operators (i.e. not in South Africa) | <input type="text"/> | <input type="text"/> | <input type="text"/> | <input type="text"/> |

Other (please specify) and/or elaborate on the international destinations

#### 40. What is the average age that live lions are sold for:

|          | Male                 | Female               |
|----------|----------------------|----------------------|
| Hunting  | <input type="text"/> | <input type="text"/> |
| Breeding | <input type="text"/> | <input type="text"/> |
| Bones    | <input type="text"/> | <input type="text"/> |

**41. In 2015, what was the average sale price of an adult lion:**

Males, to SA breeders

Males, for SA keepers

Males, for hunting in SA

Males, to international breeders

Males, to international keepers

Lioness, to SA breeders

Lioness, for SA keepers

Lioness, for hunting

Lionesses, to international breeders

Lionesses, to international keepers



**42. In 2016, what was the average sale price of an adult lion:**

Males, to SA breeders

Males, for SA keepers

Males, for hunting in SA

Males, to international breeders

Males, to international keepers

Lioness, to SA breeders

Lioness, for SA keepers

Lioness, for hunting

Lionesses, to international breeders

Lionesses, to international keepers

**43. In 2017, what was the average sale price of an adult lion:**

Males, to SA breeders

Males, for SA keepers

Males, for hunting in SA

Males, to international breeders

Males, to international keepers

Lioness, to SA breeders

Lioness, for SA keepers

Lioness, for hunting

Lionesses, to international breeders

Lionesses, to international keepers

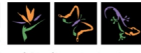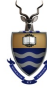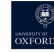

## PDF version of NATIONAL CAPTIVE LION SURVEY (South Africa) (V2: REVISED FOR 2018)

### Redirect question

**\* 44. Has the facility sold lion products, bones, skeletons, body parts, trophies and/or other derivatives?**

- ☐ Yes, we have sold products (redirect to Q45)
- ☐ No (redirect to Q55)

PDF version of NATIONAL CAPTIVE LION SURVEY (South Africa) (V2: REVISED FOR 2018)

**SECTION F: Trade in lion bones, skeletons, products and derivatives**

**45. Select the lion body parts the facility is aware of having sold/supplied to:**

|                                                   | Hunters                  | Taxidermists             | Direct to customers in Asia | To SA traders selling to Asian customers | 'Muti' traders in South Africa | Customers in other African countries | Other markets (elaborate in comments) |
|---------------------------------------------------|--------------------------|--------------------------|-----------------------------|------------------------------------------|--------------------------------|--------------------------------------|---------------------------------------|
| Full trophy (skeleton, skull, skin, teeth, claws) | <input type="checkbox"/> | <input type="checkbox"/> | <input type="checkbox"/>    | <input type="checkbox"/>                 | <input type="checkbox"/>       | <input type="checkbox"/>             | <input type="checkbox"/>              |
| Skeletons (full/partial)                          | <input type="checkbox"/> | <input type="checkbox"/> | <input type="checkbox"/>    | <input type="checkbox"/>                 | <input type="checkbox"/>       | <input type="checkbox"/>             | <input type="checkbox"/>              |
| Skin                                              | <input type="checkbox"/> | <input type="checkbox"/> | <input type="checkbox"/>    | <input type="checkbox"/>                 | <input type="checkbox"/>       | <input type="checkbox"/>             | <input type="checkbox"/>              |
| Claws                                             | <input type="checkbox"/> | <input type="checkbox"/> | <input type="checkbox"/>    | <input type="checkbox"/>                 | <input type="checkbox"/>       | <input type="checkbox"/>             | <input type="checkbox"/>              |
| Skull                                             | <input type="checkbox"/> | <input type="checkbox"/> | <input type="checkbox"/>    | <input type="checkbox"/>                 | <input type="checkbox"/>       | <input type="checkbox"/>             | <input type="checkbox"/>              |
| Teeth                                             | <input type="checkbox"/> | <input type="checkbox"/> | <input type="checkbox"/>    | <input type="checkbox"/>                 | <input type="checkbox"/>       | <input type="checkbox"/>             | <input type="checkbox"/>              |
| Paws                                              | <input type="checkbox"/> | <input type="checkbox"/> | <input type="checkbox"/>    | <input type="checkbox"/>                 | <input type="checkbox"/>       | <input type="checkbox"/>             | <input type="checkbox"/>              |
| Individual bones                                  | <input type="checkbox"/> | <input type="checkbox"/> | <input type="checkbox"/>    | <input type="checkbox"/>                 | <input type="checkbox"/>       | <input type="checkbox"/>             | <input type="checkbox"/>              |
| Fat                                               | <input type="checkbox"/> | <input type="checkbox"/> | <input type="checkbox"/>    | <input type="checkbox"/>                 | <input type="checkbox"/>       | <input type="checkbox"/>             | <input type="checkbox"/>              |
| Internal organs                                   | <input type="checkbox"/> | <input type="checkbox"/> | <input type="checkbox"/>    | <input type="checkbox"/>                 | <input type="checkbox"/>       | <input type="checkbox"/>             | <input type="checkbox"/>              |

Further comments?

**46. If the facility has used a middleman (SA and/or foreign) to export bones/skeletons to Asia, what % of the total number of skeletons went via a middleman/bone agent/trader?**

0% (no sales from this facility use a middleman/bone agent/trader)

50%

100% (all sales use a middleman/bone agent/trader)

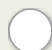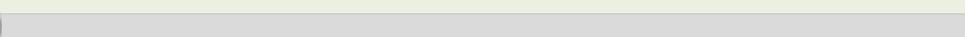



**47. If you sell bones through middlemen, have you sold bones using middlemen based in countries besides South Africa? If yes, what percentage of bones are sold through these international middlemen (against the balance sold to South African middlemen)**

0% (no sales  
through middlemen/bone  
agents/traders based in  
another country)

50%

100% (all sales use a South  
African middleman/bone  
agent/trader)

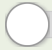


**48. Before January 2016, what percentage of:**

...skeletons originating from hunting trophies went into the bone market?

...skeletons originating from natural mortalities went into the bone market?

...skeletons originating from euthanised animals went into the bone market?

**49. Indicate the years in which lion bones/skeletons originating from this facility were exported to Asia (that you are aware of):**

☐ 2008

☐ 2012

☐ 2016

☐ 2009

☐ 2013

☐ 2017

☐ 2010

☐ 2014

☐ predicted 2018

☐ 2011

☐ 2015

**50. List the prices (or a range) at which you sold MALE lion skeletons (complete set and/or partial):** *(Indicate if this price is paid to the middleman or the Asian importer)*

2012

2013

2014

2015

2016

2017

**51. List the prices (or a range) at which you sold LIONESS skeletons (complete set and/or partial). (Indicate if this price is paid to the middleman or the Asian importer)**

2012

2013

2014

2015

2016

2017

**52. Indicate the number of skeletons (i.e. that equate to a whole lion) that made up the bone exports from this facility to Asia each year.**

2012

2013

2014

2015

2016

2017

**53. Estimate how many skeletons (i.e. that equate to a whole lion) that you could currently export to Asia in one year if there were no restrictions. Please explain how you calculated this estimate.**

## PDF version of NATIONAL CAPTIVE LION SURVEY (South Africa) (V2: REVISED FOR 2018)

### Redirect question

**\* 54. Is hunting allowed on the premises?**

- ☐ Yes, hunting is allowed (redirect to Q55)
- ☐ No, hunting is not allowed (redirect to Final Comments & Suggestions)

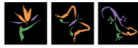

PDF version of NATIONAL CAPTIVE LION SURVEY (South Africa) (V2: REVISED FOR 2018)

**SECTION G: Lion hunting**

**55. What is the average length of time that lions have been in the hunting area at the commencement of the hunt?**

**56. Concerning hunting areas set aside for hunting, list:**

How many hunting areas?

Size of hunting area 1

Size of hunting area 2 (if applicable)

Size of hunting area 3 (if applicable)

Number of lions currently in hunting area 1?

Number of lions in hunting area 2? (if applicable)

Number of lions in hunting area 3? (if applicable)

**57. Before January 2016, indicate the percentage of clients who were from:**

South Africa

USA

United Kingdom

Europe

Middle-East

Australia

Canada

Asia

Other



**58. After January 2016, indicate the percentage of clients who were from:**

South Africa

USA

United Kingdom

Europe

Middle-East

Australia

Canada

Asia

Other

**59. How many lions were hunted on the property in:**

2012

2013

2014

2015

2016

2017

**60. After January 2016: if your income from lion hunting started to decline, what month did your business start to experience this decline:**

**61. Since January 2016, what do you estimate the total loss of earnings to be? Explain how you arrived at this figure**

**62. Due to the ban (from January 2016), how many people have you retrenched and/or been unable to support?**

Skilled workers

Unskilled workers

Professional hunters

Other 1 (describe)

Other 2 (describe)

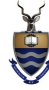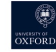

PDF version of NATIONAL CAPTIVE LION SURVEY (South Africa) (V2: REVISED FOR 2018)

**63. Any comments and suggestions?**
